# Supplementary material
Source: PubMed Central journal article supplement (PMC3542406)
Supplement: NIHMS427102-supplement-1_si_001.pdf [file NIHMS427102-supplement-1_si_001.pdf]

**Supporting Information for :**  
**Resolving uncertainties about phosphate hydrolysis pathways by**  
**careful free energy mapping**

B. Ram Prasad, Nikolay V. Plotnikov, and Arieh Warshel\*

Department of Chemistry, University of Southern California, SGM 418, 3620 McClintock Avenue, Los Angeles, California 90089.

**I. Additional information about the reaction energetics**

**Table S1:** The relative free energy (in kcal/mol) values for the hydrolysis of monomethyl pyrophosphate trianion in water. The data presented here have been utilized to generate the free energy surfaces presented of Figs. 7 and 8 of the main text. The surface was scanned in the gas phase (B3LYP/6-31+G\*) as a function of  $R_1$  and  $R_2$  for different values of  $X$ , where the system was constrained at specific  $R_1$ ,  $R_2$ , and  $X$  values and the energy is minimized with regard to all other coordinates. This is followed by a single point IEFPCM solvation calculation at the B3LYP/6-311++G\*\* level, for each of the scanned points, to gauge the effect of solvent. The least energy paths start from the lower left corner of the lower panel and proceeds through the highlighted boxes. The intermediate panels correspond to the various proton transfer (PT) coordinates as depicted in Figs. 7 and 8 of the main text. The upper most panel corresponds to the product state. The minimum free energy paths corresponding to the associative, and associative/concerted mechanisms have been highlighted.

| $R_1 \backslash R_2$ | 1.68 Å | 1.8 Å | 2.0 Å | 2.2 Å | 2.4 Å | 2.6 Å | 2.8 Å | 3.0 Å | 3.2 Å  | 3.4 Å  | 3.6 Å | 3.8 Å |
|----------------------|--------|-------|-------|-------|-------|-------|-------|-------|--------|--------|-------|-------|
| 1.65 Å               | 47.50  | 40.85 | 35.18 | 31.62 | 19.27 | 8.15  | -3.20 | -6.14 | -10.32 | -13.42 | -9.12 | -8.65 |
| 1.8 Å                | 39.84  | 34.26 | 32.32 | 29.68 | 28.13 | 21.08 | 16.17 | -2.25 | -5.13  | -8.03  | -6.19 | -5.08 |
| 1.9 Å                | 37.65  | 33.25 | 31.09 | 31.06 | 27.35 | 24.53 | 21.02 | 19.38 | 9.17   | 4.64   | 1.72  | 0.62  |
| 2.0 Å                | 37.08  | 33.91 | 32.01 | 33.17 | 28.19 | 29.46 | 27.12 | 20.12 | 11.32  | 9.52   | 6.17  | 1.37  |
| 2.1 Å                | 36.64  | 33.82 | 32.13 | 36.39 | 36.12 | 34.44 | 29.16 | 21.77 | 15.07  | 17.57  | 15.23 | 14.36 |
| 2.2 Å                | 34.45  | 32.37 | 36.39 | 35.39 | 37.01 | 39.95 | 39.01 | 38.17 | 34.32  | 32.39  | 20.12 | 27.12 |
| 2.4 Å                | 31.43  | 30.93 | 34.63 | 40.53 | 44.32 | 45.99 | 41.91 | 42.67 | 41.97  | 41.85  | 40.93 | 40.22 |
| 2.6 Å                | 27.32  | 26.93 | 33.79 | 38.03 | 45.23 | 46.68 | 47.21 | 48.12 | 43.17  | 44.17  | 46.71 | 50.07 |
| 2.8 Å                | 20.64  | 22.08 | 31.19 | 37.08 | 44.32 | 48.44 | 50.17 | 53.77 | 51.19  | 47.81  | 53.72 | 55.97 |
| 3.0 Å                | 15.37  | 18.82 | 29.23 | 34.88 | 42.60 | 47.12 | 49.74 | 52.77 | 53.17  | 55.22  | 55.37 | 55.91 |

| $R_1 \backslash R_2$ | 1.68 Å | 1.8 Å | 2.0 Å | 2.2 Å | 2.4 Å | 2.6 Å | 2.8 Å | 3.0 Å | 3.2 Å | 3.4 Å | 3.6 Å | 3.8 Å |
|----------------------|--------|-------|-------|-------|-------|-------|-------|-------|-------|-------|-------|-------|
| 1.8 Å                | 59.17  | 58.61 | 57.16 | 49.02 | 39.04 | 38.40 | 36.29 | 35.21 | 32.07 | 28.27 | 24.02 | 23.90 |
| 1.9 Å                | 51.23  | 50.99 | 50.73 | 45.20 | 40.92 | 39.29 | 38.92 | 38.04 | 37.91 | 34.32 | 30.07 | 25.27 |
| 2.0 Å                | 47.80  | 46.92 | 46.12 | 44.19 | 42.19 | 41.30 | 40.17 | 39.97 | 39.32 | 36.13 | 33.12 | 28.32 |
| 2.1 Å                | 45.92  | 44.23 | 40.28 | 43.91 | 44.70 | 44.03 | 41.71 | 42.91 | 41.12 | 40.16 | 37.12 | 29.17 |
| 2.2 Å                | 42.32  | 38.90 | 38.08 | 41.79 | 44.71 | 45.93 | 43.29 | 42.76 | 38.31 | 39.21 | 36.23 | 30.23 |

| $R_1 \backslash R_2$ | 1.68 Å | 1.8 Å | 2.0 Å | 2.2 Å | 2.4 Å | 2.6 Å | 2.8 Å | 3.0 Å | 3.2 Å | 3.4 Å | 3.6 Å | 3.8 Å |
|----------------------|--------|-------|-------|-------|-------|-------|-------|-------|-------|-------|-------|-------|
| 1.8 Å                | 64.12  | 59.30 | 52.32 | 50.92 | 49.72 | 47.31 | 47.99 | 48.91 | 46.31 | 45.13 | 41.92 | 36.64 |
| 1.9 Å                | 56.12  | 51.70 | 49.12 | 47.50 | 47.60 | 45.29 | 48.13 | 39.99 | 43.29 | 42.23 | 40.75 | 38.65 |
| 2.0 Å                | 50.29  | 46.74 | 44.61 | 46.17 | 46.44 | 45.03 | 43.29 | 46.16 | 44.71 | 43.76 | 41.58 | 40.85 |
| 2.1 Å                | 46.20  | 44.32 | 40.97 | 44.67 | 45.12 | 44.93 | 42.17 | 43.32 | 42.09 | 41.61 | 40.91 | 40.28 |
| 2.2 Å                | 41.23  | 38.10 | 37.33 | 41.12 | 43.92 | 44.17 | 42.92 | 41.67 | 40.13 | 39.92 | 39.01 | 38.27 |

| $R_1 \backslash R_2$ | 1.68 Å | 1.8 Å | 2.0 Å | 2.2 Å | 2.4 Å | 2.6 Å | 2.8 Å | 3.0 Å | 3.2 Å | 3.4 Å | 3.6 Å | 3.8 Å |
|----------------------|--------|-------|-------|-------|-------|-------|-------|-------|-------|-------|-------|-------|
| 1.8 Å                | 68.12  | 61.03 | 54.23 | 52.09 | 51.27 | 49.13 | 47.62 | 46.19 | 45.13 | 44.31 | 42.91 | 41.03 |
| 1.9 Å                | 56.22  | 51.07 | 50.17 | 48.50 | 48.06 | 45.99 | 48.31 | 40.49 | 44.92 | 43.23 | 41.28 | 38.02 |
| 2.0 Å                | 50.13  | 45.74 | 44.48 | 45.11 | 45.44 | 44.30 | 42.92 | 45.61 | 44.17 | 42.67 | 40.85 | 36.89 |
| 2.1 Å                | 44.80  | 41.16 | 39.46 | 42.60 | 43.73 | 44.11 | 41.72 | 44.80 | 43.54 | 42.61 | 40.91 | 35.51 |
| 2.2 Å                | 39.72  | 36.70 | 34.63 | 40.22 | 41.97 | 42.60 | 41.03 | 40.47 | 39.59 | 38.96 | 37.65 | 33.29 |

| $R_1 \backslash R_2$ | 1.68 Å | 1.8 Å | 2.0 Å | 2.2 Å | 2.4 Å | 2.6 Å | 2.8 Å | 3.0 Å | 3.2 Å | 3.4 Å | 3.6 Å | 3.8 Å |
|----------------------|--------|-------|-------|-------|-------|-------|-------|-------|-------|-------|-------|-------|
| 1.8 Å                | 67.03  | 59.53 | 53.12 | 51.92 | 49.23 | 48.01 | 46.37 | 45.17 | 44.02 | 41.73 | 39.13 | 39.65 |
| 1.9 Å                | 55.47  | 50.26 | 49.21 | 49.18 | 46.74 | 46.43 | 45.93 | 44.11 | 42.60 | 40.72 | 37.27 | 35.70 |
| 2.0 Å                | 47.81  | 43.32 | 43.10 | 44.41 | 44.97 | 45.01 | 43.48 | 42.41 | 40.78 | 37.23 | 32.17 | 33.32 |
| 2.1 Å                | 41.16  | 37.58 | 37.65 | 38.71 | 39.78 | 41.03 | 41.85 | 40.59 | 38.65 | 34.32 | 33.12 | 31.87 |
| 2.2 Å                | 35.14  | 32.0  | 32.63 | 35.2  | 37.08 | 39.34 | 39.97 | 33.53 | 37.46 | 33.23 | 32.87 | 30.50 |

| $R_1 \backslash R_2$ | 1.68 Å | 1.8 Å | 2.0 Å | 2.2 Å | 2.4 Å | 2.6 Å | 2.8 Å | 3.0 Å | 3.2 Å | 3.4 Å | 3.6 Å | 3.8 Å |
|----------------------|--------|-------|-------|-------|-------|-------|-------|-------|-------|-------|-------|-------|
| 1.65 Å               | 81.82  | 74.10 | 66.09 | 64.94 | 60.21 | 56.78 | 53.55 | 50.70 | 48.29 | 46.68 | 44.23 | 41.03 |
| 1.8 Å                | 62.05  | 55.53 | 50.92 | 49.07 | 41.72 | 43.17 | 40.56 | 37.71 | 35.67 | 33.19 | 31.07 | 29.86 |
| 1.9 Å                | 54.71  | 48.06 | 44.42 | 42.98 | 40.33 | 38.40 | 56.83 | 33.57 | 31.78 | 29.80 | 27.32 | 26.60 |
| 2.0 Å                | 43.27  | 43.39 | 39.28 | 39.43 | 41.72 | 36.27 | 35.19 | 32.71 | 29.92 | 28.32 | 26.21 | 25.16 |
| 2.1 Å                | 40.22  | 37.39 | 37.21 | 38.27 | 38.08 | 34.51 | 32.13 | 30.43 | 28.12 | 27.35 | 25.12 | 24.4  |
| 2.2 Å                | 30.92  | 31.07 | 32.06 | 33.18 | 34.07 | 33.21 | 31.23 | 30.0  | 29.07 | 27.51 | 25.73 | 25.29 |
| 2.4 Å                | 20.58  | 20.14 | 23.15 | 27.35 | 28.04 | 31.24 | 30.92 | 30.05 | 29.33 | 27.54 | 26.32 | 25.79 |
| 2.6 Å                | 8.61   | 5.31  | 15.02 | 17.29 | 23.27 | 25.62 | 27.12 | 28.32 | 27.12 | 27.32 | 26.07 | 25.46 |
| 2.8 Å                | 2.44   | 3.51  | 9.28  | 15.24 | 19.7  | 23.65 | 24.12 | 25.79 | 25.04 | 26.29 | 26.00 | 25.03 |
| 3.0 Å                | -2.19  | -0.62 | 5.77  | 11.85 | 16.18 | 21.27 | 22.2  | 23.78 | 24.0  | 24.53 | 24.17 | 23.53 |

**Tables S2 – S3:** The tables explore the sensitivity of the computed activation free energy barriers for the hydrolysis of phosphate monoesters along the associative and associative/concerted pathways towards different quantum potentials, and different solvation models are presented. All the gas phase, and the COSMO optimizations were carried out at the B3LYP/6-31+G\* level. “gas opt” and “cosmo opt” designate, respectively, that the initial geometries used for the single point solvent calculations are gas phase and cosmo optimized.

**Table S2:** The energetics of the key points on the PES computed using the B3LYP and MP2 potentials at 6-311++G\*\* level. The cases were presented where the influence of the solvent has been included by the IEFPCM and COSMO continuum models. Also, the performance of the COSMO model has been verified on both gas phase and cosmo optimized initial geometries at lower level (B3LYP/6-31+G\*).

| Method<br>System          | IEFPCM                            |                                 | COSMO                             |                                 | COSMO                               |                                   |
|---------------------------|-----------------------------------|---------------------------------|-----------------------------------|---------------------------------|-------------------------------------|-----------------------------------|
|                           | B3LYP/<br>6-311++G**<br>(gas opt) | MP2/<br>6-311++G**<br>(gas opt) | B3LYP/<br>6-311++G**<br>(gas opt) | MP2/<br>6-311++G**<br>(gas opt) | B3LYP/<br>6-311++G**<br>(cosmo opt) | MP2/<br>6-311++G**<br>(cosmo opt) |
| RS                        | 0                                 | 0                               | 0                                 | 0                               | 0                                   | 0                                 |
| Assoc. TS<br>(1W, PT)     | 34.64                             | 33.64                           | 35.02                             | 33.95                           | 33.33                               | 34.14                             |
| Assoc/con. TS<br>(1W, PT) | 38.62                             | 40.62                           | 40.75                             | 42.57                           | 35.10                               | 39.56                             |

**Table S3:** Comparing the activation free energy barriers between the direct proton transfer (1W) and water assisted proton transfer (2W) pathways at the TS corresponding to the Asso/conc mechanism. All the energies were computed using the B3LYP and MP2 potentials at the 6-311++G\*\* level and the solvent effect has been included by the IEFPCM and COSMO models. The performance of the COSMO model on various initial starting geometries are also presented.

| <b>Method</b><br><br><b>System</b> | IEFPCM                            |                                 | COSMO                             |                                 | COSMO                               |                                   |
|------------------------------------|-----------------------------------|---------------------------------|-----------------------------------|---------------------------------|-------------------------------------|-----------------------------------|
|                                    | B3LYP/<br>6-311++G**<br>(gas opt) | MP2/<br>6-311++G**<br>(gas opt) | B3LYP/<br>6-311++G**<br>(gas opt) | MP2/<br>6-311++G**<br>(gas opt) | B3LYP/<br>6-311++G**<br>(casmo opt) | MP2/<br>6-311++G**<br>(casmo opt) |
| Assoc/con.TS<br>(1W, PT)           | 38.62                             | 40.62                           | 40.75                             | 42.57                           | 35.10                               | 39.56                             |
| Assoc/con.TS<br>(2W, PT)           | 35.24                             | 37.19                           | 38.13                             | 40.07                           | 33.05                               | 37.69                             |

**II. The coordinates that correspond to the key characteristic points on the potential energy surface.**

**Reactant State**

|   |            |           |            |
|---|------------|-----------|------------|
| P | 105.433999 | 82.085999 | 96.531998  |
| O | 106.398490 | 82.725058 | 97.608786  |
| O | 105.430325 | 80.563675 | 96.709727  |
| O | 105.694241 | 82.816354 | 95.192413  |
| O | 103.959098 | 82.701066 | 97.050418  |
| P | 102.357432 | 82.676475 | 96.926952  |
| O | 101.838691 | 83.281695 | 95.629965  |
| O | 101.730152 | 81.304811 | 97.181133  |
| O | 101.906709 | 83.729890 | 98.203538  |
| O | 108.322090 | 80.830690 | 95.545526  |
| H | 107.425599 | 80.622400 | 95.891784  |
| H | 108.386715 | 81.810502 | 95.660569  |
| C | 101.519996 | 83.179001 | 99.440002  |
| H | 102.393529 | 82.966469 | 100.083218 |
| H | 100.882807 | 83.920217 | 99.957952  |
| H | 100.963019 | 82.240960 | 99.299140  |
| O | 108.209498 | 83.506163 | 95.890731  |
| H | 107.395267 | 83.458296 | 95.315574  |
| H | 107.672801 | 83.313663 | 96.745333  |

**Associative TS (1W, PT):**

|   |            |           |           |
|---|------------|-----------|-----------|
| P | 105.166391 | 81.804983 | 97.015889 |
| O | 105.871398 | 82.525440 | 98.193575 |
| O | 104.777511 | 80.360291 | 97.174164 |
| O | 105.412679 | 82.669090 | 95.663048 |
| O | 103.392809 | 82.691568 | 97.277372 |
| P | 101.865170 | 82.521956 | 96.879753 |
| O | 101.429017 | 83.182764 | 95.569158 |
| O | 101.296581 | 81.105746 | 97.031820 |
| O | 101.151445 | 83.506973 | 98.125358 |
| O | 107.161866 | 81.307134 | 96.234721 |
| H | 107.600473 | 81.807403 | 96.941351 |
| H | 106.485694 | 82.138750 | 95.630192 |
| C | 101.519996 | 83.179001 | 99.440002 |

|   |            |           |            |
|---|------------|-----------|------------|
| H | 102.613536 | 83.176235 | 99.562735  |
| H | 101.078633 | 83.935700 | 100.120094 |
| H | 101.138946 | 82.182640 | 99.735912  |
| O | 106.499465 | 84.852565 | 96.821206  |
| H | 105.982340 | 84.368064 | 96.137291  |
| H | 106.355749 | 84.176533 | 97.539010  |

**Associative/Concerted TS (1W, PT):**

|   |            |           |            |
|---|------------|-----------|------------|
| P | 106.431517 | 81.377495 | 95.765314  |
| O | 107.356767 | 81.865412 | 96.893364  |
| O | 105.697777 | 80.086304 | 95.913243  |
| O | 106.055953 | 82.517111 | 94.753587  |
| O | 102.997968 | 82.568980 | 96.874867  |
| P | 101.471139 | 82.763555 | 96.767450  |
| O | 100.939308 | 83.696346 | 95.655001  |
| O | 100.608219 | 81.482613 | 96.941460  |
| O | 101.066242 | 83.732899 | 98.248304  |
| O | 107.716370 | 80.980384 | 94.568879  |
| H | 108.500211 | 81.449594 | 94.919329  |
| H | 107.183008 | 81.744871 | 94.055138  |
| C | 101.519520 | 83.178696 | 99.440233  |
| H | 102.590776 | 82.911214 | 99.389071  |
| H | 101.381151 | 83.916205 | 100.266287 |
| H | 100.962503 | 82.257205 | 99.719776  |
| O | 108.289197 | 83.917254 | 95.338579  |
| H | 107.380376 | 83.804118 | 94.968242  |
| H | 108.146986 | 83.373278 | 96.156120  |

**Associative TS (2W, PT)**

|   |            |           |           |
|---|------------|-----------|-----------|
| P | 104.938465 | 82.097511 | 96.639277 |
| O | 105.475124 | 83.129318 | 97.729096 |
| O | 104.934893 | 80.647366 | 97.083771 |
| O | 104.874120 | 82.762479 | 95.239875 |
| O | 103.036207 | 82.529280 | 97.080852 |
| P | 101.525020 | 82.095478 | 96.999869 |
| O | 100.774681 | 82.463742 | 95.712934 |
| O | 101.213747 | 80.665403 | 97.470664 |
| O | 100.853058 | 83.176911 | 98.205051 |

|   |            |           |            |
|---|------------|-----------|------------|
| O | 107.071444 | 81.799476 | 96.190305  |
| H | 107.224221 | 81.399118 | 97.058642  |
| H | 107.280817 | 83.035858 | 96.182202  |
| C | 101.519996 | 83.179001 | 99.440002  |
| H | 102.604292 | 83.315485 | 99.309103  |
| H | 101.116327 | 84.012941 | 100.052668 |
| H | 101.357656 | 82.235044 | 99.998060  |
| O | 107.029506 | 84.106429 | 96.155368  |
| H | 106.285139 | 83.943942 | 95.507672  |
| H | 106.440813 | 83.967909 | 96.951767  |

**Associative / Concerted TS (2W, PT)**

|   |            |           |            |
|---|------------|-----------|------------|
| P | 106.016127 | 82.019156 | 96.388027  |
| O | 106.231602 | 83.081683 | 97.538219  |
| O | 105.669401 | 80.627586 | 96.843043  |
| O | 105.647136 | 82.715912 | 95.064966  |
| O | 102.294532 | 82.732482 | 96.672443  |
| P | 100.880730 | 82.219508 | 97.021725  |
| O | 99.712596  | 82.585791 | 96.066833  |
| O | 100.798519 | 80.735154 | 97.468294  |
| O | 100.475401 | 83.155876 | 98.508997  |
| O | 107.668499 | 81.843856 | 96.028947  |
| H | 108.060577 | 81.418978 | 96.811211  |
| H | 107.971808 | 83.119597 | 95.948615  |
| C | 101.519996 | 83.179001 | 99.440002  |
| H | 102.485761 | 83.376073 | 98.945738  |
| H | 101.320983 | 83.977420 | 100.193013 |
| H | 101.614527 | 82.217663 | 99.989613  |
| O | 107.676232 | 84.257055 | 95.958076  |
| H | 106.900317 | 84.075257 | 95.321439  |
| H | 107.122103 | 84.085679 | 96.772675  |
